# Supplementary material
Source: PubMed Central journal article supplement (PMC7879389)
Supplement: jamaophthalmol-e206860-s001.pdf [file jamaophthalmol-e206860-s001.pdf]

## Supplementary Online Content

Kim J, Byun SJ, Woo SJ, Park KH, Park SJ. Assessment of trends in the incidence rates of central retinal artery occlusion in Korea from 2002 to 2015. *JAMA Ophthalmol*. Published online February 11, 2021. doi:10.1001/jamaophthalmol.2020.6860

**eTable.** Annual Incidence Rates of Central Retinal Artery Occlusion by Age Group and Sex Among Residents of Korea From 2004 to 2005

This supplementary material has been provided by the authors to give readers additional information about their work.

**eTable.** Annual Incidence Rates of Central Retinal Artery Occlusion by Age Group and Sex Among Residents of Korea from 2004 to 2015

|       | Year | Age group (years) |      |       |       |       |       |       |       |       |       |       |       |       |       |       |       |       |       |       |                  |                   |
|-------|------|-------------------|------|-------|-------|-------|-------|-------|-------|-------|-------|-------|-------|-------|-------|-------|-------|-------|-------|-------|------------------|-------------------|
|       |      | 0-4               | 5-9  | 10-14 | 15-19 | 20-24 | 25-29 | 30-34 | 35-39 | 40-44 | 45-49 | 50-54 | 55-59 | 60-64 | 65-69 | 70-74 | 75-79 | 80-84 | 85-89 | 90-94 | 95+              | All ages (95% CI) |
| Total | 2004 | 0.15              | 0.00 | 0.03  | 0.19  | 0.28  | 0.26  | 0.55  | 1.03  | 1.34  | 2.09  | 2.62  | 3.77  | 5.69  | 8.27  | 8.20  | 9.54  | 9.02  | 3.05  | 1.91  | 8.37             | 2.38 (2.24-2.51)  |
|       | 2005 | 0.04              | 0.00 | 0.00  | 0.10  | 0.26  | 0.41  | 0.45  | 1.00  | 1.57  | 2.13  | 3.68  | 3.64  | 5.91  | 7.57  | 7.40  | 9.76  | 8.41  | 7.48  | 0.00  | 0.00             | 2.44 (2.30-2.57)  |
|       | 2006 | 0.00              | 0.00 | 0.08  | 0.25  | 0.22  | 0.46  | 0.47  | 0.64  | 1.32  | 1.46  | 2.01  | 2.96  | 4.41  | 6.65  | 9.44  | 10.39 | 7.38  | 6.99  | 1.71  | 7.17             | 2.11 (1.98-2.24)  |
|       | 2007 | 0.00              | 0.00 | 0.03  | 0.15  | 0.15  | 0.30  | 0.29  | 0.52  | 1.01  | 1.43  | 2.49  | 3.41  | 4.70  | 6.99  | 10.01 | 10.53 | 9.51  | 10.35 | 3.18  | 0.00             | 2.22 (2.09-2.35)  |
|       | 2008 | 0.04              | 0.00 | 0.03  | 0.09  | 0.19  | 0.22  | 0.55  | 0.61  | 0.99  | 1.39  | 1.97  | 3.42  | 5.15  | 7.53  | 10.56 | 8.99  | 9.45  | 7.12  | 2.97  | 0.00             | 2.20 (2.07-2.33)  |
|       | 2009 | 0.09              | 0.00 | 0.12  | 0.12  | 0.19  | 0.33  | 0.64  | 0.35  | 0.78  | 1.42  | 1.77  | 3.36  | 4.31  | 6.67  | 7.98  | 8.43  | 11.53 | 6.59  | 1.39  | 0.00             | 2.00 (1.87-2.12)  |
|       | 2010 | 0.04              | 0.00 | 0.03  | 0.14  | 0.22  | 0.24  | 0.31  | 0.38  | 1.02  | 1.35  | 1.60  | 2.62  | 4.93  | 6.25  | 7.87  | 8.40  | 10.12 | 7.01  | 7.69  | 5.22             | 1.92 (1.80-2.04)  |
|       | 2011 | 0.04              | 0.00 | 0.03  | 0.08  | 0.09  | 0.17  | 0.53  | 0.51  | 0.51  | 1.16  | 2.10  | 2.67  | 4.24  | 6.10  | 9.11  | 9.81  | 11.65 | 9.61  | 7.03  | 0.00             | 1.99 (1.87-2.12)  |
|       | 2012 | 0.00              | 0.04 | 0.03  | 0.17  | 0.22  | 0.38  | 0.30  | 0.49  | 0.66  | 0.92  | 1.12  | 2.28  | 3.97  | 5.70  | 8.75  | 10.58 | 8.36  | 8.74  | 6.31  | 0.00             | 1.80 (1.68-1.91)  |
|       | 2013 | 0.00              | 0.00 | 0.03  | 0.03  | 0.09  | 0.22  | 0.27  | 0.20  | 0.48  | 0.67  | 1.31  | 2.15  | 2.76  | 5.78  | 8.91  | 9.65  | 9.88  | 8.17  | 8.39  | 0.00             | 1.65 (1.54-1.77)  |
|       | 2014 | 0.04              | 0.04 | 0.00  | 0.03  | 0.17  | 0.29  | 0.28  | 0.41  | 0.51  | 0.81  | 1.32  | 1.69  | 3.57  | 5.28  | 7.39  | 9.18  | 10.96 | 5.99  | 8.54  | 0.00             | 1.62 (1.51-1.73)  |
| 2015  | 0.00 | 0.00              | 0.00 | 0.15  | 0.11  | 0.29  | 0.37  | 0.36  | 0.73  | 0.89  | 1.36  | 2.14  | 3.28  | 6.07  | 7.99  | 9.60  | 10.32 | 11.23 | 3.23  | 0.00  | 1.75 (1.64-1.87) |                   |
| Men   | 2004 | 0.00              | 0.00 | 0.00  | 0.18  | 0.34  | 0.40  | 0.86  | 1.40  | 1.47  | 3.28  | 2.72  | 4.52  | 6.63  | 11.56 | 10.67 | 14.88 | 11.07 | 4.63  | 9.00  | 0.00             | 2.88 (2.67-3.09)  |
|       | 2005 | 0.00              | 0.00 | 0.00  | 0.18  | 0.15  | 0.40  | 0.71  | 1.47  | 2.25  | 2.97  | 4.36  | 4.03  | 7.62  | 9.88  | 8.66  | 14.00 | 8.36  | 10.63 | 0.00  | 0.00             | 2.89 (2.68-3.10)  |
|       | 2006 | 0.00              | 0.00 | 0.11  | 0.30  | 0.21  | 0.49  | 0.41  | 0.74  | 1.75  | 1.60  | 2.58  | 3.64  | 5.43  | 7.97  | 13.22 | 20.37 | 9.55  | 13.71 | 0.00  | 40.17            | 2.61 (2.41-2.81)  |
|       | 2007 | 0.00              | 0.00 | 0.00  | 0.29  | 0.11  | 0.44  | 0.33  | 0.73  | 1.50  | 1.64  | 3.14  | 4.11  | 5.01  | 9.15  | 13.70 | 12.66 | 7.79  | 12.50 | 15.12 | 0.00             | 2.51 (2.31-2.70)  |
|       | 2008 | 0.00              | 0.00 | 0.00  | 0.17  | 0.18  | 0.24  | 0.69  | 0.90  | 1.30  | 1.80  | 2.43  | 3.56  | 6.11  | 9.17  | 14.50 | 12.36 | 13.53 | 14.55 | 6.98  | 0.00             | 2.57 (2.37-2.77)  |
|       | 2009 | 0.09              | 0.00 | 0.17  | 0.11  | 0.12  | 0.39  | 0.76  | 0.30  | 0.91  | 1.93  | 2.39  | 4.43  | 5.02  | 7.62  | 13.09 | 15.82 | 15.81 | 3.00  | 6.33  | 0.00             | 2.47 (2.28-2.67)  |
|       | 2010 | 0.09              | 0.00 | 0.06  | 0.21  | 0.24  | 0.20  | 0.35  | 0.40  | 1.34  | 1.59  | 1.86  | 3.40  | 7.11  | 9.00  | 10.50 | 11.34 | 12.32 | 14.28 | 17.01 | 0.00             | 2.34 (2.15-2.53)  |
|       | 2011 | 0.00              | 0.00 | 0.06  | 0.11  | 0.12  | 0.05  | 0.60  | 0.64  | 0.70  | 1.35  | 2.73  | 3.65  | 5.87  | 8.11  | 13.10 | 13.43 | 19.68 | 16.46 | 15.39 | 0.00             | 2.47 (2.28-2.67)  |
|       | 2012 | 0.00              | 0.08 | 0.06  | 0.16  | 0.18  | 0.29  | 0.39  | 0.52  | 0.86  | 1.04  | 1.11  | 3.16  | 5.76  | 8.53  | 10.71 | 15.94 | 10.58 | 15.68 | 18.42 | 0.00             | 2.18 (1.99-2.36)  |
|       | 2013 | 0.00              | 0.00 | 0.07  | 0.00  | 0.06  | 0.00  | 0.34  | 0.30  | 0.65  | 0.80  | 1.37  | 2.61  | 4.30  | 8.92  | 12.45 | 14.39 | 13.81 | 7.37  | 20.34 | 0.00             | 2.02 (1.84-2.20)  |
|       | 2014 | 0.08              | 0.08 | 0.00  | 0.00  | 0.11  | 0.37  | 0.20  | 0.56  | 0.65  | 0.96  | 1.74  | 2.40  | 5.42  | 7.62  | 10.26 | 12.01 | 17.96 | 10.14 | 7.40  | 0.00             | 2.02 (1.84-2.19)  |
| 2015  | 0.00 | 0.00              | 0.00 | 0.17  | 0.00  | 0.37  | 0.57  | 0.35  | 0.98  | 1.17  | 1.99  | 2.79  | 4.51  | 8.41  | 11.24 | 15.39 | 17.18 | 23.71 | 7.04  | 0.00  | 2.26 (2.07-2.44) |                   |
| Women | 2004 | 0.31              | 0.00 | 0.06  | 0.20  | 0.21  | 0.11  | 0.22  | 0.66  | 1.21  | 0.86  | 2.52  | 3.04  | 4.87  | 5.65  | 6.63  | 6.72  | 8.07  | 2.49  | 0.00  | 9.89             | 1.94 (1.77-2.12)  |
|       | 2005 | 0.08              | 0.00 | 0.00  | 0.00  | 0.38  | 0.42  | 0.18  | 0.51  | 0.85  | 1.27  | 2.98  | 3.26  | 4.37  | 5.71  | 6.56  | 7.54  | 8.43  | 6.31  | 0.00  | 0.00             | 2.03 (1.86-2.21)  |
|       | 2006 | 0.00              | 0.00 | 0.06  | 0.20  | 0.23  | 0.41  | 0.52  | 0.54  | 0.87  | 1.31  | 1.43  | 2.30  | 3.48  | 5.58  | 6.86  | 5.15  | 6.39  | 4.44  | 2.16  | 0.00             | 1.69 (1.52-1.85)  |
|       | 2007 | 0.00              | 0.00 | 0.06  | 0.00  | 0.18  | 0.15  | 0.25  | 0.31  | 0.49  | 1.22  | 1.83  | 2.73  | 4.41  | 5.20  | 7.43  | 9.39  | 10.29 | 9.53  | 0.00  | 0.00             | 1.97 (1.80-2.15)  |
|       | 2008 | 0.09              | 0.00 | 0.06  | 0.00  | 0.19  | 0.20  | 0.41  | 0.31  | 0.68  | 0.97  | 1.50  | 3.28  | 4.26  | 6.16  | 7.72  | 7.14  | 7.61  | 4.29  | 1.89  | 0.00             | 1.87 (1.70-2.04)  |
|       | 2009 | 0.09              | 0.00 | 0.06  | 0.12  | 0.27  | 0.26  | 0.52  | 0.41  | 0.66  | 0.89  | 1.13  | 2.31  | 3.64  | 5.87  | 4.22  | 4.23  | 9.61  | 7.95  | 0.00  | 0.00             | 1.58 (1.42-1.73)  |
|       | 2010 | 0.00              | 0.00 | 0.00  | 0.06  | 0.20  | 0.27  | 0.26  | 0.37  | 0.69  | 1.09  | 1.33  | 1.86  | 2.86  | 3.90  | 5.91  | 6.68  | 9.14  | 4.29  | 4.97  | 6.29             | 1.53 (1.39-1.70)  |
|       | 2011 | 0.09              | 0.00 | 0.00  | 0.06  | 0.07  | 0.29  | 0.46  | 0.38  | 0.32  | 0.97  | 1.46  | 1.70  | 2.68  | 4.36  | 6.08  | 7.60  | 8.06  | 7.08  | 4.55  | 0.00             | 1.55 (1.38-1.70)  |
|       | 2012 | 0.00              | 0.00 | 0.00  | 0.18  | 0.26  | 0.49  | 0.20  | 0.44  | 0.44  | 0.79  | 1.13  | 1.41  | 2.26  | 3.21  | 7.23  | 7.20  | 7.35  | 6.21  | 2.73  | 0.00             | 1.43 (1.28-1.58)  |
|       | 2013 | 0.00              | 0.00 | 0.00  | 0.06  | 0.13  | 0.45  | 0.20  | 0.10  | 0.31  | 0.53  | 1.26  | 1.68  | 1.29  | 2.96  | 6.14  | 6.60  | 8.03  | 8.47  | 4.84  | 0.00             | 1.31 (1.17-1.45)  |
|       | 2014 | 0.00              | 0.00 | 0.00  | 0.06  | 0.25  | 0.20  | 0.36  | 0.26  | 0.36  | 0.66  | 0.89  | 0.98  | 1.79  | 3.14  | 5.12  | 7.30  | 7.55  | 4.49  | 8.89  | 0.00             | 1.23 (1.10-1.37)  |
| 2015  | 0.00 | 0.00              | 0.00 | 0.13  | 0.24  | 0.20  | 0.16  | 0.37  | 0.46  | 0.60  | 0.71  | 1.49  | 2.10  | 3.91  | 5.38  | 5.69  | 6.84  | 6.71  | 2.09  | 0.00  | 1.25 (1.11-1.39) |                   |

CI = confidence interval, The unit for incidence rate is per 100,000 person-years.
